# Supplementary material for: Translation initiation factor eIF3 promotes programmed stop codon readthrough
Source: PubMed Central journal article supplement (PMC4446449; doi:10.1093/nar/gkv421), 2015-04-29
Supplement: supp_gkv421_nar-00814-r-2015-File009.pdf [file supp_gkv421_nar-00814-r-2015-File009.pdf]

# SUPPLEMENTARY DATA

## MATERIALS AND METHODS

### Construction of yeast strains and plasmids

List of all strains used throughout this study can be found in Table S1.

To create PBH140 and PBH134 strains; 74D-694 and L2334, respectively, were first transformed with YCp11-TIF35-MET to cover for the deletion of *TIF35* that was made in the next step by introducing the *Bam*HI-*Aat*I 5.2kb fragment carrying the *tif35Δ::hisG-URA3-hisG* integration cassette from p $\Delta$ tif35#9. The Uracil auxotrophy was regained by growing the cells on SD plates containing 5-fluoro-orotic acid (5-FOA). The resulting strain was subsequently transformed with YEp-TIF35-U and the Leucine auxotrophy was regained by growing the cells in liquid media containing Leucine and selecting for those that lost the YCp11-TIF35-MET plasmid on SD +/- Leucine plates producing PBH140 and PBH134.

List of all plasmids and PCR primers used throughout this study can be found in Tables S2 and S3, respectively.

pTH779 was created as follows. Nucleotides 6210-6505 of the viral genome, comprising the translational start at nucleotide 6473, were amplified from a cDNA clone of the viral RNA (1) using primers HiPV\_Bam\_5 and HiPV\_FLuc\_3. Firefly luciferase DNA was amplified from plasmid pTH650 (2) using primers Ff\_5 and Ff\_Sal\_3. These sequences were then recombined using overlap extension PCR, by using the two PCR products as templates in a second round PCR reaction with primers HiPV\_Bam\_5 and Ff\_Sal\_3. This generates an in-frame fusion of the first 11 codons of the HiPV capsid protein, an XbaI restriction site, and firefly luciferase from codon 2. The recombination product was cloned as a BamHI/SalI fragment into pTH645 (2) to give pTH779.

YEp-HiPV-UGAC-L and YEp-HiPV-CAAC-L were constructed by three consecutive cloning steps. First, the 1959-pb XmaI-PstI fragment from pTH779 was inserted into XmaI-PstI digested YEp181. Next, the SphI-AIwNI digested PCR product obtained with primers PBRFtermF and NIP1-AIwNI using pTH477 as a template was inserted into SphI-AIwNI digested vector from previous step. Last, the NotI-PstI digested PCR products obtained by PBRFpstI and PBRFNotI primers using pTH477 or YEp-R/T-CAAC-L as templates were inserted into NotI-PstI digested vector from previous step resulting in YEp-HiPV-UGAC-L and YEp-HiPV-CAAC-L, respectively.

YEp-R/T-UAAC-L and YEp-R/T-UAGC-L were constructed by inserting the 4567-bp AIwNI-NsiI fragment from pTH461 and pTH469, respectively, into YEplac181 digested by AIwNI-NsiI.

PBB75, PBB76 and PBB77 were constructed by inserting the 4567-bp AIwNI-NsiI fragment from pDB712, pDB714 and pDB716, respectively, into YEplac181 digested by AIwNI-NsiI.

PBB80 was created by inserting the SalI-NotI digested PCR product obtained with primers BSC4 and PBRFNotI using pTH477 as template into SalI-NotI digested pTH477.

PBB82 was created by inserting the SalI-NotI digested PCR product obtained with primers TMV and PBRFNotI using pTH477 as template into SalI-NotI digested pTH477.

PBB83 was created by inserting the *Sall-NotI* digested PCR product obtained with primers ADE1 and PBRFNotI using pTH477 as template into *Sall-NotI* digested pTH477.

PBB84 was created by inserting the *Sall-NotI* digested PCR product obtained with primers PDE2 and PBRFNotI using pTH477 as template into *Sall-NotI* digested pTH477.

PBB85 was created by inserting the *Sall-NotI* digested PCR product obtained with primers SUP45 and PBRFNotI using pTH477 as template into *Sall-NotI* digested pTH477.

pTH335 was created by inserting the *BamHI-XhoI* digested PCR product obtained with primers tW\_f and tW\_r using genomic DNA obtained from yeast strain BY4741 as template into *BamHI-XhoI* digested pRS426

pTH638 and pTH640 were created by inserting the *BamHI-HindIII* digested PCR products obtained with primers SUP4\_f and SUP4\_r using genomic DNA obtained from yeast strain BY4741 (for pTH638) or suppressor strain MT422/1c (for pTH640) as template into *BamHI-HindIII* digested pRS316.

PBB90 and PBB91 were constructed by inserting the 235-bp *BamHI-KpnI* fragment from pTH638 and pTH640, respectively, into pTH335 digested by *BamHI-KpnI*.

PBB97 was created by inserting the *BamHI-XhoI* digested PCR product obtained with primers PB94 and PB95 using genomic DNA obtained from yeast strain H464 as template into *BamHI-XhoI* digested pTH335.

PBB99 was created by inserting the *BamHI-XhoI* digested PCR product obtained with primers PB98 and PB99 using genomic DNA obtained from yeast strain H464 as template into *BamHI-XhoI* digested pTH335.

PBB100 was created by inserting the *BamHI-XhoI* digested PCR product obtained with primers PB100 and PB101 using genomic DNA obtained from yeast strain H464 as template into *BamHI-XhoI* digested pTH335.

Table S1. Yeast strains used in this study.

| <b>Strain</b>        | <b>Genotype</b>                                                                                     | <b>Source or reference</b> |
|----------------------|-----------------------------------------------------------------------------------------------------|----------------------------|
| YBS52 <sup>a</sup>   | <i>MATa leu2-3, -112 ura3-52 trp1Δ gcn2Δ tif32Δ URA3::GCN2 ura3</i> (Ycp-a/TIF32-His-U)             | (3)                        |
| H464 <sup>a</sup>    | <i>MATa leu2-3,-112 ura3-52::GCN2 trp1Δ tif35Δ</i> (hc <i>TIF35 URA3</i> )                          | (4)                        |
| PBH140 <sup>b</sup>  | <i>MATa ade1-14 trp1-289 his3-Δ200 leu2-3,112 ura3-52 tif35Δ</i> (YCp22-g/TIF35-screen)             | this study                 |
| PBH134 <sup>b</sup>  | <i>MATa ade1-14 trp1-289 his3-Δ200 leu2-3,112 ura3-52 tif35Δ sup35-N536T</i> (YCp22-g/TIF35-screen) | this study                 |
| 74D-694 <sup>b</sup> | <i>MATa ade1-14 trp1-289 his3-Δ200 leu2-3,112 ura3-52</i>                                           | (5)                        |
| L2334 <sup>b</sup>   | <i>MATa ade1-14 trp1-289 his3-Δ200 leu2-3,112 ura3-52 sup35-N536T</i>                               | (6)                        |
| BY4741               | <i>MATa his3Δ0 leu2Δ0 met15Δ0 ura3Δ0</i>                                                            | (7)                        |
| MT422/1c             | <i>ade2-1 his5-2 can1-100 ura3-1 leu2-3,122 lys1-1 met8-1 SUP4-o</i>                                | (8)                        |

Table S2. Plasmids used in this study.

| Plasmid                            | Description                                                                                                                                                                              | Source of reference   |
|------------------------------------|------------------------------------------------------------------------------------------------------------------------------------------------------------------------------------------|-----------------------|
| pTH779                             | low copy HiPV-Firefly in <i>URA3</i> plasmid from pRS316                                                                                                                                 | this study            |
| YE <sub>p</sub> -HiPV-UGAC-L       | high copy HiPV-Renilla-Firefly R/T cassette (stop codon of Renilla is UGA-C; for read-through measurements) in <i>LEU2</i> plasmid from YEplac181                                        | this study            |
| YE <sub>p</sub> -HiPV-CAAC-L       | high copy HiPV-Renilla-Firefly R/T cassette (stop codon of Renilla is replaced with CAA-C [coding triplet]; for control read-through measurements) in <i>LEU2</i> plasmid from YEplac181 | this study            |
| YC <sub>p</sub> -a/TIF32-His-L     | single copy wt <i>TIF32-His</i> in <i>LEU2</i> plasmid from YCplac111                                                                                                                    | (3)                   |
| YC <sub>p</sub> -a/tif32-Box17-His | single copy <i>tif32-Box17-His</i> in <i>LEU2</i> plasmid from YCplac111                                                                                                                 | (3)                   |
| YC <sub>p</sub> -a/tif32-Box6-His  | single copy <i>tif32-Box6-His</i> in <i>LEU2</i> plasmid from YCplac111                                                                                                                  | (3)                   |
| YC <sub>p</sub> -a/tif32-Δ8-His-L  | single copy <i>tif32-Δ8-His</i> in <i>LEU2</i> plasmid from YCplac111                                                                                                                    | Beznoskova et al 2013 |
| YC <sub>p</sub> 22-g/TIF35-screen  | single copy wt <i>TIF35-His</i> in <i>TRP1</i> plasmid from YCplac22                                                                                                                     | (4)                   |
| YC <sub>p</sub> 22-g/TIF35-KLF     | single copy <i>TIF35-KLF-His</i> in <i>TRP1</i> plasmid from YCplac22                                                                                                                    | (4)                   |
| YC <sub>p</sub> 22-g/TIF35-C121R   | single copy <i>TIF35-C121R-His</i> in <i>TRP1</i> plasmid from YCplac22                                                                                                                  | (9)                   |
| YE <sub>p</sub> -R/T-UGAC-L        | high copy PGK-Renilla-Firefly R/T cassette (stop codon of Renilla is UGA-C; for read-through measurements) in <i>LEU2</i> plasmid from YEplac181                                         | (9)                   |
| YE <sub>p</sub> -R/T-CAAC-L        | high copy PGK-Renilla-Firefly R/T cassette (stop codon of Renilla is replaced with CAA-C [coding triplet]; for control read-through measurements) in <i>LEU2</i> plasmid from YEplac181  | (9)                   |
| YEplac181                          | high copy cloning vector, <i>LEU2</i>                                                                                                                                                    | (10)                  |
| YEplac195                          | high copy cloning vector, <i>URA3</i>                                                                                                                                                    | (10)                  |
| pSP35-45                           | high copy wt <i>SUP45 SUP35</i> in <i>URA3</i>                                                                                                                                           | (11)                  |
| pTH335                             | high copy <i>URA3</i> vector (pRS426) containing genomic DNA surrounding the tW(CCA)G1 gene                                                                                              | this study            |
| pTH461                             | high copy PGK-Renilla-Firefly R/T cassette (stop codon of Renilla is UAA-C; for read-through                                                                                             | (12)                  |

|                   |                                                                                                                                                  |            |
|-------------------|--------------------------------------------------------------------------------------------------------------------------------------------------|------------|
|                   | measurements) in <i>URA3</i> plasmid from YEplac195                                                                                              |            |
| pTH469            | high copy PGK-Renilla-Firefly R/T cassette (stop codon of Renilla is UAG-C; for read-through measurements) in <i>URA3</i> plasmid from YEplac195 | (12)       |
| YEplac-R/T-UAAC-L | high copy PGK-Renilla-Firefly R/T cassette (stop codon of Renilla is UAA-C; for read-through measurements) in <i>LEU2</i> plasmid from YEplac181 | this study |
| YEplac-R/T-UAGC-L | high copy PGK-Renilla-Firefly R/T cassette (stop codon of Renilla is UAG-C; for read-through measurements) in <i>LEU2</i> plasmid from YEplac181 | this study |
| pTH638            | centromeric <i>URA3</i> vector (pRS316) containing the tY(GUA)J2 wild-type gene (=SUP4)                                                          | this study |
| pTH640            | centromeric <i>URA3</i> vector (pRS316) containing an opal suppressor mutant of tY(GUA)J2 gene                                                   | this study |
| PBB90             | high copy <i>URA3</i> vector (pRS426) containing the tY(GUA)J2 wild-type gene (=SUP4)                                                            | this study |
| PBB91             | high copy <i>URA3</i> vector (pRS426) containing an opal suppressor mutant of tY(GUA)J2 gene                                                     | this study |
| PBB97             | high copy <i>tC(GCA)P1</i> in <i>URA2</i> plasmid from pRS426                                                                                    | this study |
| PBB99             | high copy <i>tR(UCU)E</i> in <i>URA2</i> plasmid from pRS426                                                                                     | this study |
| PBB100            | high copy <i>tG(UCC)O</i> in <i>URA2</i> plasmid from pRS426                                                                                     | this study |
| pDB712            | high copy PGK-Renilla-Firefly R/T cassette (stop codon of Renilla is UGA-A; for read-through measurements) in <i>URA3</i> plasmid from YEplac195 | (12)       |
| pDB714            | high copy PGK-Renilla-Firefly R/T cassette (stop codon of Renilla is UGA-G; for read-through measurements) in <i>URA3</i> plasmid from YEplac195 | (12)       |
| pDB716            | high copy PGK-Renilla-Firefly R/T cassette (stop codon of Renilla is UGA-U; for read-through measurements) in <i>URA3</i> plasmid from YEplac195 | (12)       |

|                    |                                                                                                                                                       |            |
|--------------------|-------------------------------------------------------------------------------------------------------------------------------------------------------|------------|
| PBB75              | high copy PGK-Renilla-Firefly R/T cassette (stop codon of Renilla is UGA-A; for read-through measurements) in <i>LEU2</i> plasmid from YEplac181      | this study |
| PBB76              | high copy PGK-Renilla-Firefly R/T cassette (stop codon of Renilla is UGA-G; for read-through measurements) in <i>LEU2</i> plasmid from YEplac181      | this study |
| PBB77              | high copy PGK-Renilla-Firefly R/T cassette (stop codon of Renilla is UGA-U; for read-through measurements) in <i>LEU2</i> plasmid from YEplac181      | this study |
| pTH477             | high copy PGK-Renilla-Firefly R/T cassette (stop codon of Renilla is UGA-CCGUUC; for read-through measurements) in <i>URA3</i> plasmid from YEplac195 | (12)       |
| PBB80              | high copy PGK-Renilla-Firefly R/T cassette (stop codon of Renilla is UGA-CAACUA; for read-through measurements) in <i>URA3</i> plasmid from YEplac195 | this study |
| PBB82              | high copy PGK-Renilla-Firefly R/T cassette (stop codon of Renilla is UGA-CAUUA; for read-through measurements) in <i>URA3</i> plasmid from YEplac195  | this study |
| PBB83              | high copy PGK-Renilla-Firefly R/T cassette (stop codon of Renilla is UGA-AACGGU; for read-through measurements) in <i>URA3</i> plasmid from YEplac195 | this study |
| PBB84              | high copy PGK-Renilla-Firefly R/T cassette (stop codon of Renilla is UGA-CAAGAA; for read-through measurements) in <i>URA3</i> plasmid from YEplac195 | this study |
| PBB85              | high copy PGK-Renilla-Firefly R/T cassette (stop codon of Renilla is UGA-AUAAA; for read-through measurements) in <i>URA3</i> plasmid from YEplac195  | this study |
| YcP11-TIF35-MET    | single copy <i>TIF35</i> under <i>MET3</i> promoter, <i>LEU2</i> plasmid from Ycplac11                                                                | (4)        |
| p $\Delta$ tif35#9 | the <i>TIF35</i> deletion construct with the <i>hisG-URA3-hisG</i> cassette inserted in                                                               | (4)        |

|             |                                                                 |      |
|-------------|-----------------------------------------------------------------|------|
|             | between the 5' and 3' UTRs of <i>TIF35</i>                      |      |
| YEp-TIF35-U | high copy wt <i>TIF35</i> in <i>LEU2</i> plasmid from YEplac352 | (13) |

Table S3. Primers used in this study.

| <b>Primer name</b> | <b>Primer sequence (5' to 3')</b>                         |
|--------------------|-----------------------------------------------------------|
| HiPV_Bam_5         | GCGCGGGATCCAAACATTGTGCGAAGCTTCTTGGCTC                     |
| HiPV_FLuc_3        | CCTTTCTTTATGTTTTTGGCGTCTTCCTGCAGATTTGTAT<br>TGTTATTATTATT |
| Ff_5               | GAAGACGCCAAAAACATAAAGAAAGG                                |
| Ff_Sal_3           | GGGGGGGTGCGACTTACAATTTGGACTTTCCGCCCTTC                    |
| PBRFtermF          | AATAAGCATGCGCGGCCGCAAGCTTTTCGTGGCCGAG<br>G                |
| NIP1-AlwNI         | CTGTTACCAGTGGCTGCTGCC                                     |
| PBRFpstI           | AATAACTGCAGACTTCGAAAGTTTATGATCCA                          |
| PBRFNotI           | CTCGAAGCGGCCGCTCTAGAATTACAC                               |
| BSC4               | CAAATGTCGACGTGCGATTGACAAGTAGGATCCTTCAA<br>CTTCCCTGAGCTCG  |
| TIF32              | CAAATGTCGACGTGCGATTGACAGACAGGATCCTTCAA<br>CTTCCCTGAGCTCG  |
| TMV                | CAAATGTCGACGTGCGATTGACAATTAGGATCCTTCAAC<br>TTCCCTGAGCTCG  |
| ADE1               | CAAATGTCGACGTGCGATTGAAACGGTGGATCCTTCAA<br>CTTCCCTGAGCTCG  |
| PDE2               | CAAATGTCGACGTGCGATTGACAAGAAGGATCCTTCAA<br>CTTCCCTGAGCTCG  |
| SUP45              | CAAATGTCGACGTGCGATTGAATAAATGGATCCTTCAAC<br>TTCCCTGAGCTCG  |
| tW_f               | GCGCGCCTCGAGATTTTTTACATTTGTTCTATCAGTTAG<br>T              |
| tW_r               | CGCGCGGGATCCTATAAAAAGAACATATTCATACGGGC                    |
| SUP4_f             | CCCCCGGATCCTTCAATTGTATATGTGTTATGTAGTATA<br>C              |
| SUP4_r             | CCCCCAAGCTTTTTTCAACTTGCAAGTCTGGGAAGTG                     |
| PB94               | AATAACTCGAGTTGCGTGGATAAGTGTTATTATTCTATT<br>GCC            |
| PB95               | AATAAGGATCCAAAGCCGTACAGGCGAACGTATATAATT<br>AAAATTC        |
| PB98               | AATAACTCGAGTAACACGTTAATATGGTGGAGTCAGCT<br>GAG             |
| PB99               | AATAAGGATCCTAATCTGCCGTATGTTCTGGTATTTACT<br>GGTTAGG        |
| PB100              | AATAACTCGAGTAATGTTATAGTGATTGAGATCAGTTTC<br>ACC            |
| PB101              | AATAAGGATCCGGTTATTTACGTCCCGGAGGAAAAAA<br>AGTTTG           |



## REFERENCES

1. Nakashima, N., Sasaki, J. and Toriyama, S. (1999) Determining the nucleotide sequence and capsid-coding region of himetobi P virus: a member of a novel group of RNA viruses that infect insects. *Archives of virology*, **144**, 2051-2058.
2. Chu, D., Barnes, D.J. and von der Haar, T. (2011) The role of tRNA and ribosome competition in coupling the expression of different mRNAs in *Saccharomyces cerevisiae*. *Nucleic Acids Res*, **39**, 6705-6714.
3. Munzarová, V., Pánek, J., Gunišová, S., Dányi, I., Szamecz, B. and Valášek, L.S. (2011) Translation Reinitiation Relies on the Interaction between eIF3a/TIF32 and Progressively Folded cis-Acting mRNA Elements Preceding Short uORFs. *PLoS Genet*, **7**, e1002137.
4. Cuchalová, L., Kouba, T., Herrmannová, A., Danyi, I., Chiu, W.-I. and Valášek, L. (2010) The RNA Recognition Motif of Eukaryotic Translation Initiation Factor 3g (eIF3g) Is Required for Resumption of Scanning of Posttermination Ribosomes for Reinitiation on GCN4 and Together with eIF3i Stimulates Linear Scanning. *Mol Cell Biol*, **30**, 4671-4686.
5. Chernoff, Y.O., Derkach, I.L. and Inge-Vechtomov, S.G. (1993) Multicopy SUP35 gene induces de-novo appearance of psi-like factors in the yeast *Saccharomyces cerevisiae*. *Curr Genet*, **24**, 268-270.
6. Bradley, M.E., Bagriantsev, S., Vishveshwara, N. and Liebman, S.W. (2003) Guanidine reduces stop codon read-through caused by missense mutations in SUP35 or SUP45. *Yeast*, **20**, 625-632.
7. Brachmann, C.B., Davies, A., Cost, G.J., Caputo, E., Li, J., Hieter, P. and Boeke, J.D. (1998) Designer deletion strains derived from *Saccharomyces cerevisiae* S288C: a useful set of strains and plasmids for PCR-mediated gene disruption and other applications. *Yeast*, **14**, 115-132.
8. Kurjan, J., Hall, B.D., Gillam, S. and Smith, M. (1980) Mutations at the yeast SUP4 tRNA<sup>Tyr</sup> locus: DNA sequence changes in mutants lacking suppressor activity. *Cell*, **20**, 701-709.
9. Beznosková, P., Cuchalová, L., Wagner, S., Shoemaker, C.J., Gunišová, S., Von der Haar, T. and Valášek, L.S. (2013) Translation initiation factors eIF3 and HCR1 control translation termination and stop codon read-through in yeast cells. *PLoS Genet*, **9**, e1003962.
10. Gietz, R.D. and Sugino, A. (1988) New yeast-*Escherichia coli* shuttle vectors constructed with in vitro mutagenized yeast genes lacking six-base pair restriction sites. *Gene*, **74**, 527-534.
11. Bidou, L., Stahl, G., Hatin, I., Namy, O., Rousset, J.P. and Farabaugh, P.J. (2000) Nonsense-mediated decay mutants do not affect programmed -1 frameshifting. *Rna*, **6**, 952-961.
12. Keeling, K.M., Lanier, J., Du, M., Salas-Marco, J., Gao, L., Kaenjank-Angeletti, A. and Bedwell, D.M. (2004) Leaky termination at premature stop codons antagonizes nonsense-mediated mRNA decay in *S. cerevisiae*. *RNA*, **10**, 691-703.
13. Asano, K., Phan, L., Anderson, J. and Hinnebusch, A.G. (1998) Complex formation by all five homologues of mammalian translation initiation factor 3 subunits from yeast *Saccharomyces cerevisiae*. *J Biol Chem*, **273**, 18573-18585.

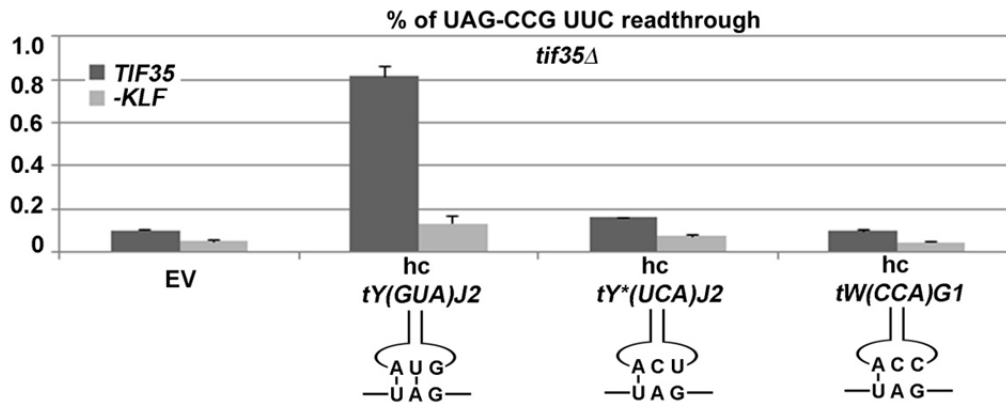

Supplementary Figure S1. eIF3 promotes incorporation of aminoacyl-tRNAs with a mismatch at the 3<sup>rd</sup> position only of all three stop codons. eIF3 enhances incorporation of the near-cognate tRNA also at the UAG stop codon with a mismatch at the 3<sup>rd</sup> position [*tY(GUA)J2* – encoding tyrosine] but not with non-cognate *tY\*(UCA)J2* or *tW(CCA)G1*. The PBH140 derivatives bearing *TIF35* wt and *tif35-KLF* mutant alleles (generated as described in Figure 2) were transformed with empty vector (EV), hc *tY(GUA)J2*, hc *tY\*(UCA)J2* or hc *tW(CCA)G1*, and subsequently also with the readthrough construct YEp-R/T-UAGC-L, and the resulting transformants were grown and processed for stop codon readthrough measurements as described in Experimental Procedures.
